# Supplementary material
Source: Elsevier journal article supplement (https://www.sciencedirect.com/science/article/pii/S1575181317301031)
Supplement: mmc1 [file S1575181317301031:mmc1.doc]

Anexos

Anexo 1

**CUESTIONARIO DE VALORACION DE LA ACTIVIDAD**

| Nombre de la actividad: | FORMACIÓN CONTINUADA EN URGENCIAS; ACTUALIZACIÓN EN URGENCIA DE ATENCIÓN PRIMARIA 2015 |
| --- | --- |
| Entidad que la organiza: | UNIDAD FORMACIÓN ATENCIÓN PRIMARIA |
| Fecha de cumplimentación: | **ENERO A DICIEMBRE 2015** |

**Solicitamos su colaboración para hacer una valoración del curso. Aunque este cuestionario es anónimo, estaríamos interesados en conocer determinados aspectos de su perfil profesional:**

| **EDAD** |  | **TIPO DE PERSONAL** |  | **DATOS PROFESIONALES** |
| --- | --- | --- | --- | --- |
| hasta 25 años |  | Estatuario |  | Licenciatura |
| de 26 a 35 años |  | Laboral |  | Diplomatura |
| de 36-45 años  Desde 46 años |  | Funcionario |  | FPGS  FPGM |
|  |  |  |  |  |
| **SEXO** |  |  |  | **Situación laboral** |
| Mujer |  |  |  | Fijo/a |
| Hombre |  |  |  | Temporal  En desempleo |

**Le rogamos conteste sobre los siguientes aspectos relativos a la actividad que acaba de finalizar.**

**1 2 3 4 5**

Muy en desacuerdo En desacuerdo Término medio De acuerdo Muy de acuerdo

|  | **1** | **2** | **3** | **4** | **5** |
| --- | --- | --- | --- | --- | --- |
| 1. He recibido información sobre los objetivos generales del curso |  |  |  |  |  |
| 1. El curso ha conseguido los objetivos propuestos |  |  |  |  |  |
| 1. Los contenidos del curso han correspondido a los que se esperaba cuando se inscribió |  |  |  |  |  |
| 1. El nivel de conocimientos con que se han tratado los temas ha sido adecuado |  |  |  |  |  |
| 1. Considera que el curso le ha aportado nuevos conocimientos |  |  |  |  |  |
| 1. La metodología docente de este curso ha sido adecuada |  |  |  |  |  |
| 1. La documentación entregada ha sido útil y de actualidad |  |  |  |  |  |
| 1. El curso ha estado bien organizado |  |  |  |  |  |
| 1. Las condiciones de las aulas y el equipamiento han sido adecuados |  |  |  |  |  |
| 1. El curso es de interés para su actividad profesional |  |  |  |  |  |
| 1. Recomendaría la asistencia a este curso a sus compañeros/as. |  |  |  |  |  |
| 1. Está satisfecho de haber realizado este curso. |  |  |  |  |  |

**VALORACIÓN DEL PROFESORADO**

| **(MARCAR X )** | **Ha sido capaz de explicar y trasmitir sus conocimientos con habilidad y claridad.** | | | | | | **La relación entre el/la profesor/a y el alumnado ha sido cordial y se ha desarrollado en un clima favorable.** | | | | | | **Se ha mostrado accesible y ha facilitado la participación y el intercambio de experiencias a lo largo del curso.** | | | | | |
| --- | --- | --- | --- | --- | --- | --- | --- | --- | --- | --- | --- | --- | --- | --- | --- | --- | --- | --- |
| **NOMBRE** | **1** | **2** | **3** | **4** | **5** | **1** | | **2** | **3** | **4** | **5** | **1** | | **2** | **3** | **4** | **5** |  |
|  |  |  |  |  |  |  | |  |  |  |  |  | |  |  |  |  |  |
|  |  |  |  |  |  |  | |  |  |  |  |  | |  |  |  |  |  |
|  |  |  |  |  |  |  | |  |  |  |  |  | |  |  |  |  |  |
|  |  |  |  |  |  |  | |  |  |  |  |  | |  |  |  |  |  |
|  |  |  |  |  |  |  | |  |  |  |  |  | |  |  |  |  |  |
|  |  |  |  |  |  |  | |  |  |  |  |  | |  |  |  |  |  |
|  |  |  |  |  |  |  | |  |  |  |  |  | |  |  |  |  |  |
|  |  |  |  |  |  |  | |  |  |  |  |  | |  |  |  |  |  |
|  |  |  |  |  |  |  | |  |  |  |  |  | |  |  |  |  |  |

**OBSERVACIONES / SUGERENCIAS:** (Indicar en este apartado cualquier aspecto relativo al curso: material, profesores, programa, instalaciones, etc…).

………………………………………………………………………………………………………

………………………………………………………………………………………………………

…………………….…………………………………………………………………………………

………………………………………………………………………………………………………

………………………………………….……………………………………………………………

………………………………………………………………………………………………………

……………………………………………………………………………………………………………………………………………………………………………………………………………………………………………………………………….................................................................
